# Supplementary material for: Clinical characteristics associated with persistent and emerging eating disorder risk in young people presenting for mental health care
Source: Research Square preprint supplement (doi:10.21203/rs.3.rs-6264963/v1), 2025-07-25
Supplement: Supplementary file 1 [file 5bd0e6f79cf2807c624e3c58.docx]

In the sample who completed an ED risk assessment at baseline (n=774), differences in demographic and clinical variables between those included in the final sample (n=494) and those lost to follow-up (n=280) were assessed using Wilcoxon rank-sum test and Fisher’s exact test. Effect sizes and 95% confidence intervals were calculated to complement significance testing: rank biserial correlation coefficients (r) for continuous variables and odds ratios (OR) for categorical variables.

**Table S1. Demographic and clinical differences between the final sample and those lost to follow-up**

| **Characteristic** | **Included in final sample**  **(n=494)** | **Lost to follow-up**  **(n=280)** | **Effect size [95% CI]** | **p value** |
| --- | --- | --- | --- | --- |
| *Demographic variables* | |  |  |  |
| Age, years | 18.35 ± 3.21 | 18.20 ± 3.23 | r = 0.02 [-0.06, 0.10] | .640 |
| Sex, % female | 340 (68.83) | 171 (61.07) | OR = 0.71 [0.52, 0.98] | **.033** |
| NEET, % yes | 84 (17.00) | 53 (18.93) | OR = 1.14 [0.76, 1.69] | .495 |
|  |  |  |  |  |
| *Clinical variables* | |  |  |  |
| SCOFF, score /5 | 1.14 ± 1.25 | 1.14 ± 1.24 | r = 0.00 [-0.09, 0.08] | .947 |
| QIDS, score /27 | 10.14 ± 5.47 | 10.33 ± 5.10 | r = -0.02 [-0.11, 0.06] | .590 |
| GAD-7, score /21 | 9.73 ± 6.00 | 10.09 ± 5.95 | r = -0.04 [-0.12, 0.05] | .406 |
| SOFAS, score /100 | 66.37 ± 11.66 | 64.06 ± 11.38 | r = 0.11 [0.02, 0.19] | **.012** |
| Rumination, score /40φ | 28.95 ± 6.83 | 28.71 ± 7.56 | r = 0.01 [-0.07, 0.09] | .811 |
| Deliberate self-harm, % yes | 212 (42.91) | 119 (42.50) | OR = 0.99 [0.73, 1.35] | .999 |

Note. NEET = Not in Education, Employment or Training; QIDS = Quick Inventory of Depressive Symptomatology; GAD = Generalised Anxiety Disorder; SOFAS = Social and Occupational Functioning Assessment Scale.

Data are presented as mean ± standard deviation for continuous variables and n (%) for categorical variables.
